# Supplementary material for: Implementing a social innovation for community-based peer support for immigrant mothers in Sweden: a mixed-methods process evaluation
Source: Front Public Health. 2024 Jan 11;11:1332738. doi: 10.3389/fpubh.2023.1332738 (PMC10821792; doi:10.3389/fpubh.2023.1332738)
Supplement: Supplementary file 2 [file Data_Sheet_2.XLSX]

## Sheet: Sheet1
Theme	Category	Selected quotes
Context	Mistrust of the social services	In the beginning, when I talked to someone about that I work as a peer supporter at Yallatrappan and help those in need, they thought I worked with the social services, and they didn't dare talk about anything. They said no, no, no, in case a second mother wanted to say something, the first mother said [hushing sound]. Why, I said. No, no, we have everything, my husband is doing great, my childre…
		Yes, there was a time when there was a lot in the media, on TikTok and WhatsApp and YouTube, about the social services taking the children. So we had a hard time those days. So they always asked "do you work with social services?". So others... There is propaganda that we work with social services too. So we have to show them that we don't work with social services. [Peer supporter #3]
		About the social services, they ask when they take children, they say "why do the social services take children". Yes. So we tell them about it. So it's not always like that... They just think that the social services go and take children. Maybe there are problems in the family. So we tell them about it. [Peer supporter #4]
	Obstructive norms and expectations	When it comes to something that concerns the woman herself, that she should take a course or that she should go on an outdoor trip or that she should do something for her own sake, she always has to ask her husband. And that's a thing that's quite difficult to work out, like, for the peer supporters to work with, it becomes quite difficult right away, I mean, because you might not want to encoura…
		What it is based on... Male insecurity. No, I'm just kidding. No, but outdated patriarchal structures, definitely. So the woman has been at home for eight years and then suddenly someone comes along and encourages her to go out and meet friends, take part in society, and then it gets scary at home. And he wonders why, like, why are you going out now all of a sudden, are you getting a divorce? We'…
		I asked one mother, why doesn't he like you to come out? No, you have a lot to do, you have to take care of children, you have to cook, clean. [Peer supporter #5]
	An enabling organizational form	You only accept information from someone you trust, someone you have a relationship with, someone you have confidence in. It's as simple as that. And that's not always authorities and administrations, but rather us [Yallatrappan], who are more independent in our relationship with the citizens. Plus we have activities that have existed for a long time in the area, that are appreciated and importan…
		I consider it lifesaving for me. [...] Because who else would help? I mean, this is an organization that is trustworthy. [Mother #8]
		I think it's good that Yallatrappan is the owner of the project. Because I think Yallatrappan has that focus, and also those conditions with the multicultural background. So I think that the ownership from Yallatrappan's side is also one of the keys to success. I think we at Yallatrappan have a good reputation among the target group. [Steering group member #5]
	Lack of funds	And I look forward to the possibility that at some point we will be able to find this ... That this collaboration becomes more stable, that you don't have to go around worrying about money if the budget, if you get it in, which I can think has taken basically the whole... A large part of the steering group meetings, where we have not been able to go in depth really and talk about values, be able …
		So, in other words, there has even been interest in having a civil society public partnership there. But then there's also the fact that Yallatrappan has become so established and won lots of prizes, has received like... So there's also a, as we say in Scanian, weariness. And I think there are politicians in Malmö who think that yes, but like, yes, but we can't have another civil society public p…
		But having a fixed budget, being able to... Being able to plan long-term, even more long-term would have been a success in itself. [Steering group member #5]
Implementation	Wide reach within specified groups	The peer supporters work a lot in their local area where they live, because they have a pretty good idea of who lives around them and so on. But those who are the most isolated, we don't reach them. You probably have to reach them through the social services, and maybe not even then. [Steering group member #6]
		I think the biggest group that is difficult to reach is the Romani people. It's the Romani children. And we've even talked about it with my immediate management, that we've even thought about the peer supporters, for example whether we should perhaps have a peer supporter who speaks Romani now. [Steering group member #4]
		But when we do outreach work, everyone we meet is a new family. Everyone we meet is a new family when we do outreach work. So there are many people we talk to. [...] We might talk... For example, we work six hours. So we are here at Rosengård, and we recruit more than ten people here. [Peer supporter #3]
	Needs-based dose	You see, in the beginning when I first met her, I used to need her [help] a lot with a lot of things. But you know with time, one will get to know things. You become more aware of things. So my need for her now is not like before, but I still need her. [Mother #6]
		I can't say that I sit with a mother for two or three hours or an hour or half an hour. It depends on what they need. Sometimes they only need ten minutes. [Peer supporter #2]
		Approximately you know... As needed. Sometimes, because I have work, or she has work… When I have a question or she has a question, you know we would talk. Sometimes twice a month, sometimes more. [Mother #5]
	Linking rather than educating clients	I think some peer supporters [educate mothers] a lot and some peer supporters don't do it at all. I know that [one peer supporter] is very good at doing it, and I've heard her do it too. And she often talks about it, like this, the importance of education. This is very important, this is for the sake of your children. And if your children get a good education, they will be strengthened in life. V…
		Not that deep. No, no. Because we are not trained in that. Not that deep, but we usually say that if you need, it's very important, we have different cultures [...] How you raise children in Somalia, for example, and how you raise children here in Sweden, it's completely different. So this is very important. We recommend that you take that course, you should get more information about how Sweden …
		Yes, I used to talk about it like you said, but you know, I talked a bit about parenting to help them. But really we tell them that it's good to go to that course, and they will answer the question comprehensively that you have thought about or wondered about. [Peer supporter #2]
	Doing more than originally intended	I helped her a lot with housing. She had no housing. She had a child who had a disability. They lived in a hotel and it was a lot. And the child too, he got even worse with epilepsy, and it was a lot. It affected him. And the social services couldn't help with housing. So I used to help her by going to the housing site here in Malmö, registering for an apartment. [Peer supporter #1]
		A mother, from [country], she told me that my husband beats me. And she needs to separate, she wanted to separate. And she knows what she means, she really wanted, she doesn't have children and she wanted to separate. So I said to her why not. So I told her I don't know in what way. I gave her to a lawyer, a lawyer for women, I had a number. [...] So yes, sometimes I have sent them there, provide…
		But it has been difficult. I think it is difficult for the peer supporters to first tell you about the services they can offer, and how important it is, and that you have an understanding of what needs you have when you are new and so on. And then someone comes up and like, can you help me with this? And then in conversation it turns out that they don't have any children, or that they have childr…
	Local adaptation of Philani’s methods	But when it comes to home visits, they have been... It's one of those things that I feel that no, the home visits have not really turned out as we intended. [Steering group member #3]
		I know that some of them are in some clients' homes, and I have said that I don't think they should do that from a work environment point of view. It's not very good. We have no idea what is waiting there, and especially not by themselves. [Steering group member #6]
		I have told her that I will come to her house, but I don't go up, I just stay outside. I have said that I will come there. [...] She has told me to go there, but I have said no, I don't like the security of the house or whatever. It's better to go to another place or something. [Peer supporter #2]
	Building trust through flexibility, credibility, competence and care	The right people in the right place, yes. Well, that's always what it's all about. [Steering group member #2]
		There are many, absolutely many, that I can't answer because I don't know. If I'm unsure or think it's not right, I can't say anything. I go to [supervisor] and she has answered me correctly. In that case I answer them. I say I can't answer now, I'll answer tomorrow. I go to [supervisor], and she answers me, and then I go back again. Otherwise they won't... Have confidence, you know. If you say t…
		Every time I refer the peer supporters somewhere, I get like a thank you letter, because they are so damn good at their job. That's the key to success. The fact that they are super empathetic, that they are very sweet and nice and friendly and polite when they come and explain very clearly, and that you can tell that they are so passionate about their work. So I think that's the key to the fact t…
	Internal support structures	And if you need help directly, you can go to [supervisor] all the time, you can say, or always send SMS or WhatsApp. She answers directly, directly. Yes, she does. If I need help from her urgently, you could say, to show her papers or something. Absolutely, [supervisor] says, I want to see you. Okay, come in and we'll get it done right away. [Peer supporter #2]
		And then I also think that [the supervisor] has been very present as project manager and has handled things that have arisen in a very serious and professional manner. That she has created a sense of security in the organization and for the women. [Steering group member #2]
		So we work as a network. [...] All the time, actually. So you don't feel that it's tough or it's a hard job, because all the time I think about my colleagues helping me, and they think about me. [Peer supporter #2]
	Multiple arenas for outreach	Child health services, mostly through the child health services as they are neighbors with the open preschools. So when they see someone who does not know the language, they say okay, she can speak Arabic and they call the Arabic-speaking [peer supporter]. [Peer supporter #3]
		We have Somali associations, Arab associations. So we meet them there too. It's a day that they have a meeting there, so we come and speak to them as well. [Peer supporter #3]
		A woman told me about them and that's how I got in touch with them. [...] The woman is my cousin. She knew them because they have helped her before, just as they have helped me. [Mother #2]
	Practical assistance as an entry point to comprehensive support	It starts with like, can you help me with this paper? There are often very practical concerns to begin with. And then it builds up along the way. [...] So often it's those needs first, and then it's like this... Yes, but knowledge and information. How do you do this? How do you do that? And are you entitled to it and how much does it cost and how do you register, and so on. And one thing often le…
		So there are a lot of work-related issues, I would say, a lot about employment for the mothers. But it's also a pretty easy thing to talk about, I think. It's not so sensitive. [Steering group member #6]
Mechanisms of impact	Relationship-building enables difficult conversations	It became a beautiful relationship, friendship, not just a formal or limited relationship. [...] This is how this job should be, it shouldn’t be that people are just like a train, work, and that’s it, their job is done. They have to be friendly, so that people can like them and feel safe and comfortable when they ask for their help. And honestly that’s what’s happening. [Mother #6]
		It's not everyone they develop a personal relationship with, or a deeper relationship with. But some. And then there's this, like, yes, but domestic violence, I don't want any more children, what should I do? Or I want a divorce, what... Because he is violent, I want sole custody. So... That comes later. And it's quite frequent. But it's precisely those with whom you have a deeper relationship. […
		She thinks you work as a social worker, and she doesn't dare talk to you. But one and one and one, they understand. Those two exactly, they became like my friends. They talked to me about everything, like privately. Yeah. They understood that what we are saying, it remains here, in this room. [Peer supporter #2]
	Clients appreciating the intervention but seeing its limits	When I needed help communicating with the children's schools and I couldn't do it myself, they helped. When I wanted to contact the health service, they taught me how to do it and also helped me with the language. When I had problems with financial assistance, they supported me and talked to the social services officer and explained the situation. As a mother, I could sleep well and my mind calme…
		I think the relationship between me and the peer supporter is good. It has contributed very positively to my life. She informs me when new things happen. She helps me when I need help. I can talk to her about my problems, she listens and tries to solve them with me. She and other peer supporters help us a lot. I can say it's a very good relationship. [Mother #1]
		She asked about my kids, about their way of life, if I needed anything, if I had any obstacles, or any struggles. I mean it was such an open conversation you know. Even if someone has any problems, they can resort to them to be honest. Especially when it comes to women that could be abused or something. In my opinion this place… They are women too, and they are knowledgeable. They have ways of co…
	Clients value the close personal bond	You know I would honestly describe her as a sister, a life-long sister truly. [...] I mean yes, she is a friend, you feel that she is a friend, I mean our relationship is very, very beautiful. You know, she really connects to a person and makes them talk about their matters. This is something that is very comforting to mothers that have come to Malmö recently. They are in need, especially those t…
	Blurred lines between work and personal identity	I work all the time, but I don't feel like it's work. [...] You know when you want to do what you do, you don't feel tired or that it's hard or anything. I don't feel that. [Peer supporter #2]
		I think the peer supporters are needed. They need more than six hours actually. Because the weekend, you work the weekend too. They call you. So you know, we have different cultures. In our culture, when I help you, and you see that I help you, they don't think that it's Saturday or Sunday. They just call you. I need this, this, this, can you help me? So the peer supporters need more time. [Peer …
		First when I started as a peer supporter, when I saw a mother I just started talking. I didn't know it was the weekend. Even though it was the weekend, even at a party too, I started introducing myself. [Peer supporter #5]
